# Supplementary material for: Antifungal Susceptibility and Mutations in the Squalene Epoxidase Gene in Dermatophytes of the Trichophyton mentagrophytes Species Complex
Source: PubMed Central journal article supplement (PMC8284460; doi:10.1128/aac.00056-21), 2021-07-16
Supplement: aac00056-21_supp_1_seq12.pdf [file aac00056-21_supp_1_seq12.pdf]

**Table S-1.** Metadata of strains used in the study.

| Number | Original Number | Country     | Source         | Collect by       | ITS Genotype                  | multilocus comparison<br>(ITS, <i>Tef1-a</i> , <i>HMG</i> ) |
|--------|-----------------|-------------|----------------|------------------|-------------------------------|-------------------------------------------------------------|
| 1      | XM2             | China       | Tinea faciei   | Ping Zhan        | <i>T. interdigitale</i>       | <i>T. interdigitale</i>                                     |
| 2      | XM9             | China       | Tinea faciei   | Ping Zhan        | <i>T. interdigitale</i>       | <i>T. interdigitale</i>                                     |
| 3      | XM10            | China       | Onychomycosis  | Ping Zhan        | <i>T. interdigitale</i>       | <i>T. interdigitale</i>                                     |
| 4      | XM16            | China       | Tinea faciei   | Ping Zhan        | <i>T. interdigitale</i>       | <i>T. interdigitale</i>                                     |
| 5      | XM30            | China       | Tinea faciei   | Ping Zhan        | <i>T. interdigitale</i>       | <i>T. interdigitale</i>                                     |
| 6      | XM32            | China       | Tinea capitis  | Ping Zhan        | <i>T. interdigitale</i>       | <i>T. interdigitale</i>                                     |
| 7      | XM40            | China       | Tinea corporis | Ping Zhan        | <i>T. interdigitale</i>       | <i>T. interdigitale</i>                                     |
| 8      | XM45            | China       | Tinea faciei   | Ping Zhan        | <i>T. interdigitale</i>       | <i>T. interdigitale</i>                                     |
| 9      | XM48            | China       | Tinea capitis  | Ping Zhan        | <i>T. interdigitale</i>       | <i>T. interdigitale</i>                                     |
| 10     | 208             | Netherlands | Tinea          | Hein van der Lee | <i>T. interdigitale</i>       | <i>T. interdigitale</i>                                     |
| 11     | 216             | Netherlands | Tinea          | Hein van der Lee | <i>T. interdigitale</i>       | <i>T. interdigitale</i>                                     |
| 12     | 276             | Netherlands | Tinea          | Hein van der Lee | <i>T. interdigitale</i>       | <i>T. interdigitale</i>                                     |
| 13     | 278             | Netherlands | Tinea          | Hein van der Lee | <i>T. interdigitale</i>       | <i>T. interdigitale</i>                                     |
| 14     | 321             | Netherlands | Tinea          | Hein van der Lee | <i>T. interdigitale</i>       | <i>T. interdigitale</i>                                     |
| 15     | 335             | Netherlands | Tinea          | Hein van der Lee | <i>T. interdigitale</i>       | <i>T. interdigitale</i>                                     |
| 16     | 394             | Netherlands | Tinea          | Hein van der Lee | <i>T. interdigitale</i>       | <i>T. interdigitale</i>                                     |
| 17     | 421             | Netherlands | Tinea          | Hein van der Lee | <i>T. interdigitale</i>       | <i>T. interdigitale</i>                                     |
| 18     | 439             | Netherlands | Tinea          | Hein van der Lee | <i>T. interdigitale</i>       | <i>T. interdigitale</i>                                     |
| 19     | 440             | Netherlands | Tinea          | Hein van der Lee | <i>T. interdigitale</i>       | <i>T. interdigitale</i>                                     |
| 20     | V10-04          | Netherlands | unknown        | Hein van der Lee | <i>T. interdigitale</i>       | <i>T. interdigitale</i>                                     |
| 21     | V10-41          | Netherlands | Tinea          | Hein van der Lee | <i>T. interdigitale</i>       | <i>T. interdigitale</i>                                     |
| 22     | V21-14          | Netherlands | Onychomycosis  | Hein van der Lee | <i>T. interdigitale</i>       | <i>T. interdigitale</i>                                     |
| 23     | V70-35          | Netherlands | Tinea          | Hein van der Lee | <i>T. interdigitale</i>       | <i>T. interdigitale</i>                                     |
| 24     | V155-6          | Netherlands | unknown        | Hein van der Lee | <i>T. interdigitale</i>       | <i>T. interdigitale</i>                                     |
| 25     | A11             | Australia   | Onychomycosis  | Steven           | <i>T. interdigitale</i>       | <i>T. interdigitale</i>                                     |
| 26     | A18             | Australia   | Onychomycosis  | Steven           | <i>T. interdigitale</i>       | <i>T. interdigitale</i>                                     |
| 27     | A31             | Australia   | Onychomycosis  | Steven           | <i>T. interdigitale</i>       | <i>T. interdigitale</i>                                     |
| 28     | A44             | Australia   | Onychomycosis  | Steven           | <i>T. interdigitale</i>       | <i>T. interdigitale</i>                                     |
| 29     | A50             | Australia   | Onychomycosis  | Steven           | <i>T. interdigitale</i>       | <i>T. interdigitale</i>                                     |
| 30     | A60             | Australia   | Onychomycosis  | Steven           | <i>T. interdigitale</i>       | <i>T. interdigitale</i>                                     |
| 31     | A73             | Australia   | Onychomycosis  | Steven           | <i>T. interdigitale</i>       | <i>T. interdigitale</i>                                     |
| 32     | A171            | Australia   | Onychomycosis  | Steven           | <i>T. interdigitale</i>       | <i>T. interdigitale</i>                                     |
| 33     | A177            | Australia   | Onychomycosis  | Steven           | <i>T. interdigitale</i>       | <i>T. interdigitale</i>                                     |
| 34     | A191            | Australia   | Onychomycosis  | Steven           | <i>T. interdigitale</i>       | <i>T. interdigitale</i>                                     |
| 35     | A221            | Australia   | Onychomycosis  | Steven           | <i>T. interdigitale</i>       | <i>T. interdigitale</i>                                     |
| 36     | A238            | Australia   | Onychomycosis  | Steven           | <i>T. interdigitale</i>       | <i>T. interdigitale</i>                                     |
| 37     | 218893/16       | Germany     | Tinea capitis  | Nenoff           | <i>T. mentagrophytes III*</i> | <i>T. mentagrophytes</i>                                    |
| 38     | 200602/17       | Germany     | Tinea corporis | Nenoff           | <i>T. mentagrophytes IV</i>   | <i>T. mentagrophytes</i>                                    |
| 39     | 200617/17       | Germany     | Tinea corporis | Nenoff           | <i>T. mentagrophytes IV</i>   | <i>T. mentagrophytes</i>                                    |
| 40     | 204543/17       | Germany     | Tinea          | Nenoff           | <i>T. mentagrophytes IV</i>   | <i>T. mentagrophytes</i>                                    |
| 41     | V155-32         | Netherlands | unknown        | Hein van der Lee | <i>T. mentagrophytes IV</i>   | <i>T. mentagrophytes</i>                                    |

|    |           |             |                 |            |                               |                          |
|----|-----------|-------------|-----------------|------------|-------------------------------|--------------------------|
| 42 | XM20      | China       | Tinea capitis   | Ping Zhan  | <i>T. mentagrophytes IV</i>   | <i>T. mentagrophytes</i> |
| 43 | XM21      | China       | Tinea capitis   | Ping Zhan  | <i>T. mentagrophytes IV</i>   | <i>T. mentagrophytes</i> |
| 44 | 210363/16 | Germany     | Tinea genitalis | Nenoff     | <i>T. mentagrophytes VII</i>  | <i>T. mentagrophytes</i> |
| 45 | 218904/16 | Germany     | Tinea genitalis | Nenoff     | <i>T. mentagrophytes VII</i>  | <i>T. mentagrophytes</i> |
| 46 | 215003/16 | Germany     | Tinea genitalis | Nenoff     | <i>T. mentagrophytes VII</i>  | <i>T. mentagrophytes</i> |
| 47 | XM1       | China       | Tinea ear       | Ping Zhan  | <i>T. mentagrophytes IX</i>   | <i>T. mentagrophytes</i> |
| 48 | XM4       | China       | Tinea capitis   | Ping Zhan  | <i>T. mentagrophytes IX</i>   | <i>T. mentagrophytes</i> |
| 49 | XM5       | China       | Tinea faciei    | Ping Zhan  | <i>T. mentagrophytes IX</i>   | <i>T. mentagrophytes</i> |
| 50 | XM6       | China       | Tinea faciei    | Ping Zhan  | <i>T. mentagrophytes IX</i>   | <i>T. mentagrophytes</i> |
| 51 | XM7       | China       | Tinea cruris    | Ping Zhan  | <i>T. mentagrophytes IX</i>   | <i>T. mentagrophytes</i> |
| 52 | XM8       | China       | Tinea capitis   | Ping Zhan  | <i>T. mentagrophytes IX</i>   | <i>T. mentagrophytes</i> |
| 53 | XM11      | China       | Tinea faciei    | Ping Zhan  | <i>T. mentagrophytes IX</i>   | <i>T. mentagrophytes</i> |
| 54 | XM12      | China       | Tinea faciei    | Ping Zhan  | <i>T. mentagrophytes IX</i>   | <i>T. mentagrophytes</i> |
| 55 | XM14      | China       | Tinea capitis   | Ping Zhan  | <i>T. mentagrophytes IX</i>   | <i>T. mentagrophytes</i> |
| 56 | XM19      | China       | Tinea capitis   | Ping Zhan  | <i>T. mentagrophytes IX</i>   | <i>T. mentagrophytes</i> |
| 57 | XM22      | China       | Tinea faciei    | Ping Zhan  | <i>T. mentagrophytes IX</i>   | <i>T. mentagrophytes</i> |
| 58 | XM26      | China       | Tinea capitis   | Ping Zhan  | <i>T. mentagrophytes IX</i>   | <i>T. mentagrophytes</i> |
| 59 | XM27      | China       | Tinea capitis   | Ping Zhan  | <i>T. mentagrophytes IX</i>   | <i>T. mentagrophytes</i> |
| 60 | XM34      | China       | Tinea corporis  | Ping Zhan  | <i>T. mentagrophytes IX</i>   | <i>T. mentagrophytes</i> |
| 61 | XM35      | China       | Tinea capitis   | Ping Zhan  | <i>T. mentagrophytes IX</i>   | <i>T. mentagrophytes</i> |
| 62 | XM36      | China       | Tinea capitis   | Ping Zhan  | <i>T. mentagrophytes IX</i>   | <i>T. mentagrophytes</i> |
| 63 | XM37      | China       | Tinea capitis   | Ping Zhan  | <i>T. mentagrophytes IX</i>   | <i>T. mentagrophytes</i> |
| 64 | XM39      | China       | Tinea capitis   | Ping Zhan  | <i>T. mentagrophytes IX</i>   | <i>T. mentagrophytes</i> |
| 65 | XM41      | China       | Unknown         | Ping Zhan  | <i>T. mentagrophytes IX</i>   | <i>T. mentagrophytes</i> |
| 66 | XM42      | China       | Tinea faciei    | Ping Zhan  | <i>T. mentagrophytes IX</i>   | <i>T. mentagrophytes</i> |
| 67 | XM46      | China       | Tinea faciei    | Ping Zhan  | <i>T. mentagrophytes IX</i>   | <i>T. mentagrophytes</i> |
| 68 | XM49      | China       | Tinea faciei    | Ping Zhan  | <i>T. mentagrophytes IX</i>   | <i>T. mentagrophytes</i> |
| 69 | XM54      | China       | Unknown         | Ping Zhan  | <i>T. mentagrophytes IX</i>   | <i>T. mentagrophytes</i> |
| 70 | XM55      | China       | Tinea cruris    | Ping Zhan  | <i>T. mentagrophytes IX</i>   | <i>T. mentagrophytes</i> |
| 71 | XM56      | China       | Unknown         | Ping Zhan  | <i>T. mentagrophytes IX</i>   | <i>T. mentagrophytes</i> |
| 72 | 211497/17 | West India  | Tinea corporis  | Nenoff     | <i>T. mentagrophytes VIII</i> | <i>T. indotineae</i>     |
| 73 | 211509/17 | West India  | Tinea           | Nenoff     | <i>T. mentagrophytes VIII</i> | <i>T. indotineae</i>     |
| 74 | 216500/17 | Nord India  | Tinea           | Nenoff     | <i>T. mentagrophytes VIII</i> | <i>T. indotineae</i>     |
| 75 | 216520/17 | Nord India  | Tinea           | Nenoff     | <i>T. mentagrophytes VIII</i> | <i>T. indotineae</i>     |
| 76 | 200074/18 | South India | Tinea           | Nenoff     | <i>T. mentagrophytes VIII</i> | <i>T. indotineae</i>     |
| 77 | 200095/18 | South India | Tinea           | Nenoff     | <i>T. mentagrophytes VIII</i> | <i>T. indotineae</i>     |
| 78 | 200100/18 | West India  | Tinea corporis  | Nenoff     | <i>T. mentagrophytes VIII</i> | <i>T. indotineae</i>     |
| 79 | 200101/18 | West India  | Tinea corporis  | Nenoff     | <i>T. mentagrophytes VIII</i> | <i>T. indotineae</i>     |
| 80 | 1728      | East India  | Tinea           | Nenoff     | <i>T. mentagrophytes VIII</i> | <i>T. indotineae</i>     |
| 81 | i2        | India       | Tinea cruris    | Rameshwari | <i>T. mentagrophytes VIII</i> | <i>T. indotineae</i>     |
| 82 | i3        | India       | Tinea cruris    | Rameshwari | <i>T. mentagrophytes VIII</i> | <i>T. indotineae</i>     |
| 83 | i5        | India       | Tinea manuum    | Rameshwari | <i>T. mentagrophytes VIII</i> | <i>T. indotineae</i>     |
| 84 | i7        | India       | Tinea cruris    | Rameshwari | <i>T. mentagrophytes VIII</i> | <i>T. indotineae</i>     |
| 85 | i8        | India       | Tinea cruris    | Rameshwari | <i>T. mentagrophytes VIII</i> | <i>T. indotineae</i>     |

|     |         |       |              |                |                               |                      |
|-----|---------|-------|--------------|----------------|-------------------------------|----------------------|
| 86  | i10     | India | Tinea cruris | Rameshwari     | <i>T. mentagrophytes VIII</i> | <i>T. indotineae</i> |
| 87  | i11     | India | Tinea pedis  | Rameshwari     | <i>T. mentagrophytes VIII</i> | <i>T. indotineae</i> |
| 88  | i12     | India | Tinea cruris | Rameshwari     | <i>T. mentagrophytes VIII</i> | <i>T. indotineae</i> |
| 89  | i14     | India | Tinea cruris | Rameshwari     | <i>T. mentagrophytes VIII</i> | <i>T. indotineae</i> |
| 90  | i15     | India | Tinea cruris | Rameshwari     | <i>T. mentagrophytes VIII</i> | <i>T. indotineae</i> |
| 91  | i16     | India | Tinea faciei | Rameshwari     | <i>T. mentagrophytes VIII</i> | <i>T. indotineae</i> |
| 92  | i19     | India | Tinea cruris | Rameshwari     | <i>T. mentagrophytes VIII</i> | <i>T. indotineae</i> |
| 93  | i20     | India | Tinea cruris | Rameshwari     | <i>T. mentagrophytes VIII</i> | <i>T. indotineae</i> |
| 94  | i21     | India | Tinea cruris | Rameshwari     | <i>T. mentagrophytes VIII</i> | <i>T. indotineae</i> |
| 95  | i23     | India | Tinea cruris | Rameshwari     | <i>T. mentagrophytes VIII</i> | <i>T. indotineae</i> |
| 96  | i24     | India | Tinea cruris | Rameshwari     | <i>T. mentagrophytes VIII</i> | <i>T. indotineae</i> |
| 97  | i25     | India | Tinea cruris | Rameshwari     | <i>T. mentagrophytes VIII</i> | <i>T. indotineae</i> |
| 98  | i26     | India | Tinea cruris | Rameshwari     | <i>T. mentagrophytes VIII</i> | <i>T. indotineae</i> |
| 99  | i27     | India | Tinea cruris | Rameshwari     | <i>T. mentagrophytes VIII</i> | <i>T. indotineae</i> |
| 100 | i29     | India | Tinea cruris | Rameshwari     | <i>T. mentagrophytes VIII</i> | <i>T. indotineae</i> |
| 101 | i32     | India | Tinea cruris | Rameshwari     | <i>T. mentagrophytes VIII</i> | <i>T. indotineae</i> |
| 102 | i35     | India | Tinea cruris | Rameshwari     | <i>T. mentagrophytes VIII</i> | <i>T. indotineae</i> |
| 103 | i36     | India | Tinea cruris | Rameshwari     | <i>T. mentagrophytes VIII</i> | <i>T. indotineae</i> |
| 104 | i38     | India | Tinea cruris | Rameshwari     | <i>T. mentagrophytes VIII</i> | <i>T. indotineae</i> |
| 105 | i39     | India | Tinea cruris | Rameshwari     | <i>T. mentagrophytes VIII</i> | <i>T. indotineae</i> |
| 106 | i40     | India | Tinea cruris | Rameshwari     | <i>T. mentagrophytes VIII</i> | <i>T. indotineae</i> |
| 107 | i41     | India | Tinea cruris | Rameshwari     | <i>T. mentagrophytes VIII</i> | <i>T. indotineae</i> |
| 108 | i42     | India | Tinea cruris | Rameshwari     | <i>T. mentagrophytes VIII</i> | <i>T. indotineae</i> |
| 109 | i43     | India | Tinea cruris | Rameshwari     | <i>T. mentagrophytes VIII</i> | <i>T. indotineae</i> |
| 110 | i47     | India | Tinea cruris | Rameshwari     | <i>T. mentagrophytes VIII</i> | <i>T. indotineae</i> |
| 111 | i48     | India | Tinea cruris | Rameshwari     | <i>T. mentagrophytes VIII</i> | <i>T. indotineae</i> |
| 112 | i49     | India | Tinea faciei | Rameshwari     | <i>T. mentagrophytes VIII</i> | <i>T. indotineae</i> |
| 113 | V245-44 | India | Unknown      | Ashutosh Singh | <i>T. mentagrophytes VIII</i> | <i>T. indotineae</i> |
| 114 | V245-45 | India | Unknown      | Ashutosh Singh | <i>T. mentagrophytes VIII</i> | <i>T. indotineae</i> |
| 115 | V245-46 | India | Unknown      | Ashutosh Singh | <i>T. mentagrophytes VIII</i> | <i>T. indotineae</i> |
| 116 | V245-50 | India | Unknown      | Ashutosh Singh | <i>T. mentagrophytes VIII</i> | <i>T. indotineae</i> |
| 117 | V245-54 | India | Unknown      | Ashutosh Singh | <i>T. mentagrophytes VIII</i> | <i>T. indotineae</i> |
| 118 | V245-81 | India | Unknown      | Ashutosh Singh | <i>T. mentagrophytes VIII</i> | <i>T. indotineae</i> |
| 119 | V246-01 | India | Unknown      | Ashutosh Singh | <i>T. mentagrophytes VIII</i> | <i>T. indotineae</i> |
| 120 | V246-03 | India | Unknown      | Ashutosh Singh | <i>T. mentagrophytes VIII</i> | <i>T. indotineae</i> |
| 121 | V246-04 | India | Unknown      | Ashutosh Singh | <i>T. mentagrophytes VIII</i> | <i>T. indotineae</i> |
| 122 | V246-05 | India | Unknown      | Ashutosh Singh | <i>T. mentagrophytes VIII</i> | <i>T. indotineae</i> |
| 123 | V246-08 | India | Unknown      | Ashutosh Singh | <i>T. mentagrophytes VIII</i> | <i>T. indotineae</i> |
| 124 | V246-11 | India | Unknown      | Ashutosh Singh | <i>T. mentagrophytes VIII</i> | <i>T. indotineae</i> |
| 125 | V246-12 | India | Unknown      | Ashutosh Singh | <i>T. mentagrophytes VIII</i> | <i>T. indotineae</i> |
| 126 | V246-13 | India | Unknown      | Ashutosh Singh | <i>T. mentagrophytes VIII</i> | <i>T. indotineae</i> |
| 127 | V246-14 | India | Unknown      | Ashutosh Singh | <i>T. mentagrophytes VIII</i> | <i>T. indotineae</i> |
| 128 | V246-16 | India | Unknown      | Ashutosh Singh | <i>T. mentagrophytes VIII</i> | <i>T. indotineae</i> |
| 129 | V246-19 | India | Unknown      | Ashutosh Singh | <i>T. mentagrophytes VIII</i> | <i>T. indotineae</i> |

|     |         |       |         |                |                               |                      |
|-----|---------|-------|---------|----------------|-------------------------------|----------------------|
| 130 | V246-20 | India | Unknown | Ashutosh Singh | <i>T. mentagrophytes VIII</i> | <i>T. indotineae</i> |
| 131 | V246-21 | India | Unknown | Ashutosh Singh | <i>T. mentagrophytes VIII</i> | <i>T. indotineae</i> |
| 132 | V246-22 | India | Unknown | Ashutosh Singh | <i>T. mentagrophytes VIII</i> | <i>T. indotineae</i> |
| 133 | V246-23 | India | Unknown | Ashutosh Singh | <i>T. mentagrophytes VIII</i> | <i>T. indotineae</i> |
| 134 | V246-24 | India | Unknown | Ashutosh Singh | <i>T. mentagrophytes VIII</i> | <i>T. indotineae</i> |
| 135 | V246-25 | India | Unknown | Ashutosh Singh | <i>T. mentagrophytes VIII</i> | <i>T. indotineae</i> |

**Table S2.** The result of strains (n=50) grown on containing TBF and ITZ agar.

| Number | Original Number | multilocus comparison (ITS, <i>Tef1-<math>\alpha</math></i> , <i>HMG</i> ) | MIC of TBF (mg/l) | RPMI 1640 agar TBF (0.2mg/l) | MIC of ITZ (mg/l) | RPMI 1640 agar ITZ (4.0mg/l) |
|--------|-----------------|----------------------------------------------------------------------------|-------------------|------------------------------|-------------------|------------------------------|
| 1      | i2              | <i>T. indotineae</i>                                                       | >16               | Positive                     | 0.125             | Negative                     |
| 2      | i5              | <i>T. indotineae</i>                                                       | 0.25              | Positive                     | 0.5               | Negative                     |
| 3      | i7              | <i>T. indotineae</i>                                                       | >16               | Positive                     | 0.25              | Negative                     |
| 4      | i8              | <i>T. indotineae</i>                                                       | >16               | Positive                     | 0.125             | Negative                     |
| 5      | i11             | <i>T. indotineae</i>                                                       | >16               | Positive                     | 0.125             | Negative                     |
| 6      | i14             | <i>T. indotineae</i>                                                       | >16               | Positive                     | 1.0               | Negative                     |
| 7      | i15             | <i>T. indotineae</i>                                                       | >16               | Positive                     | 0.125             | Negative                     |
| 8      | i19             | <i>T. indotineae</i>                                                       | >16               | Positive                     | 0.0625            | Negative                     |
| 9      | i21             | <i>T. indotineae</i>                                                       | >16               | Positive                     | 0.125             | Negative                     |
| 10     | i24             | <i>T. indotineae</i>                                                       | >16               | Positive                     | 0.25              | Negative                     |
| 11     | i25             | <i>T. indotineae</i>                                                       | >16               | Positive                     | 0.25              | Negative                     |
| 12     | i26             | <i>T. indotineae</i>                                                       | >16               | Positive                     | 0.125             | Negative                     |
| 13     | i32             | <i>T. indotineae</i>                                                       | >16               | Positive                     | 1.0               | Negative                     |
| 14     | i35             | <i>T. indotineae</i>                                                       | >16               | Positive                     | 0.125             | Negative                     |
| 15     | i36             | <i>T. indotineae</i>                                                       | >16               | Positive                     | 0.25              | Negative                     |
| 16     | i38             | <i>T. indotineae</i>                                                       | >16               | Positive                     | 0.25              | Negative                     |
| 17     | i39             | <i>T. indotineae</i>                                                       | >16               | Positive                     | 0.0625            | Negative                     |
| 18     | i40             | <i>T. indotineae</i>                                                       | >16               | Positive                     | 1.0               | Negative                     |
| 19     | i42             | <i>T. indotineae</i>                                                       | >16               | Positive                     | 0.25              | Negative                     |
| 20     | i43             | <i>T. indotineae</i>                                                       | >16               | Positive                     | 0.125             | Negative                     |
| 21     | i48             | <i>T. indotineae</i>                                                       | >16               | Positive                     | 0.125             | Negative                     |
| 22     | i49             | <i>T. indotineae</i>                                                       | >16               | Positive                     | 0.125             | Negative                     |
| 23     | V245-45         | <i>T. indotineae</i>                                                       | >16               | Positive                     | 0.125             | Negative                     |
| 24     | V245-50         | <i>T. indotineae</i>                                                       | >16               | Positive                     | 0.125             | Negative                     |
| 25     | V245-81         | <i>T. indotineae</i>                                                       | >16               | Positive                     | 0.25              | Negative                     |
| 26     | V246-01         | <i>T. indotineae</i>                                                       | >16               | Positive                     | 0.125             | Negative                     |
| 27     | V246-03         | <i>T. indotineae</i>                                                       | >16               | Positive                     | 0.0625            | Negative                     |
| 28     | V246-04         | <i>T. indotineae</i>                                                       | >16               | Positive                     | 0.25              | Negative                     |
| 29     | V246-13         | <i>T. indotineae</i>                                                       | 0.5               | Positive                     | 0.031             | Negative                     |
| 30     | V246-14         | <i>T. indotineae</i>                                                       | >16               | Positive                     | 0.5               | Negative                     |
| 31     | V246-16         | <i>T. indotineae</i>                                                       | >16               | Positive                     | 0.125             | Negative                     |

|    |                  |                  |        |          |        |          |
|----|------------------|------------------|--------|----------|--------|----------|
| 32 | V246-20          | T. indotineae    | 0.5    | Positive | 0.031  | Negative |
| 33 | V246-25          | T. indotineae    | >16    | Positive | 0.125  | Negative |
| 34 | 211497/17        | T. indotineae    | >16    | Positive | 0.25   | Negative |
| 35 | 200074/18        | T. indotineae    | >16    | Positive | 0.25   | Negative |
| 36 | 200095/18        | T. indotineae    | >16    | Positive | 0.125  | Negative |
| 37 | 200100/18        | T. indotineae    | >16    | Positive | 0.625  | Negative |
| 38 | ATCC<br>MYA-4439 | T. interdigitale | 0.016  | Negative | 0.125  | Negative |
| 39 | 211509/17        | T. indotineae    | 0.125  | Negative | 0.125  | Negative |
| 40 | i12              | T. indotineae    | 0.125  | Negative | 0.25   | Negative |
| 41 | i10              | T. indotineae    | 0.125  | Negative | 0.25   | Negative |
| 42 | i16              | T. indotineae    | 0.0625 | Negative | 0.125  | Negative |
| 43 | i20              | T. indotineae    | 0.0625 | Negative | 0.125  | Negative |
| 44 | i23              | T. indotineae    | 0.125  | Negative | 0.25   | Negative |
| 45 | i27              | T. indotineae    | 0.0625 | Negative | 0.031  | Negative |
| 46 | i41              | T. indotineae    | 0.0625 | Negative | 0.25   | Negative |
| 47 | i47              | T. indotineae    | 0.0625 | Negative | 0.25   | Negative |
| 48 | V245-46          | T. indotineae    | 0.0625 | Negative | 0.0625 | Negative |
| 49 | V246-11          | T. indotineae    | 0.125  | Negative | 0.25   | Negative |
| 50 | V246-12          | T. indotineae    | 0.031  | Negative | 0.25   | Negative |

---
